# Supplementary material
Source: Frontiers journal article supplement (https://www.frontiersin.org/articles/296914)
Supplement: Image_1.PDF [file Image_1.PDF]

## *Supplementary Material*

# **Dietary intervention with $\beta$ -lactoglobulin-derived peptides and a specific mixture of fructo-oligosaccharides and *Bifidobacterium breve* M-16V facilitates the prevention of whey-induced allergy in mice by supporting a tolerance-prone immune environment**

**Atanaska I. Kostadinova, Alba Pablos-Tanarro, Mara A.P. Diks, Betty C.A.M. van Esch, Johan Garssen, Léon M.J. Knippels, Linette E.M. Willemsen\***

\* **Correspondence:** Linette E.M. Willemsen, Division of Pharmacology, Utrecht Institute for Pharmaceutical Sciences, Utrecht University, PO Box 80195, 3805TD Utrecht, The Netherlands  
l.e.m.willemsen@uu.nl

## **1 Supplementary Figures and Tables**

### **1.1 Supplementary Figures**

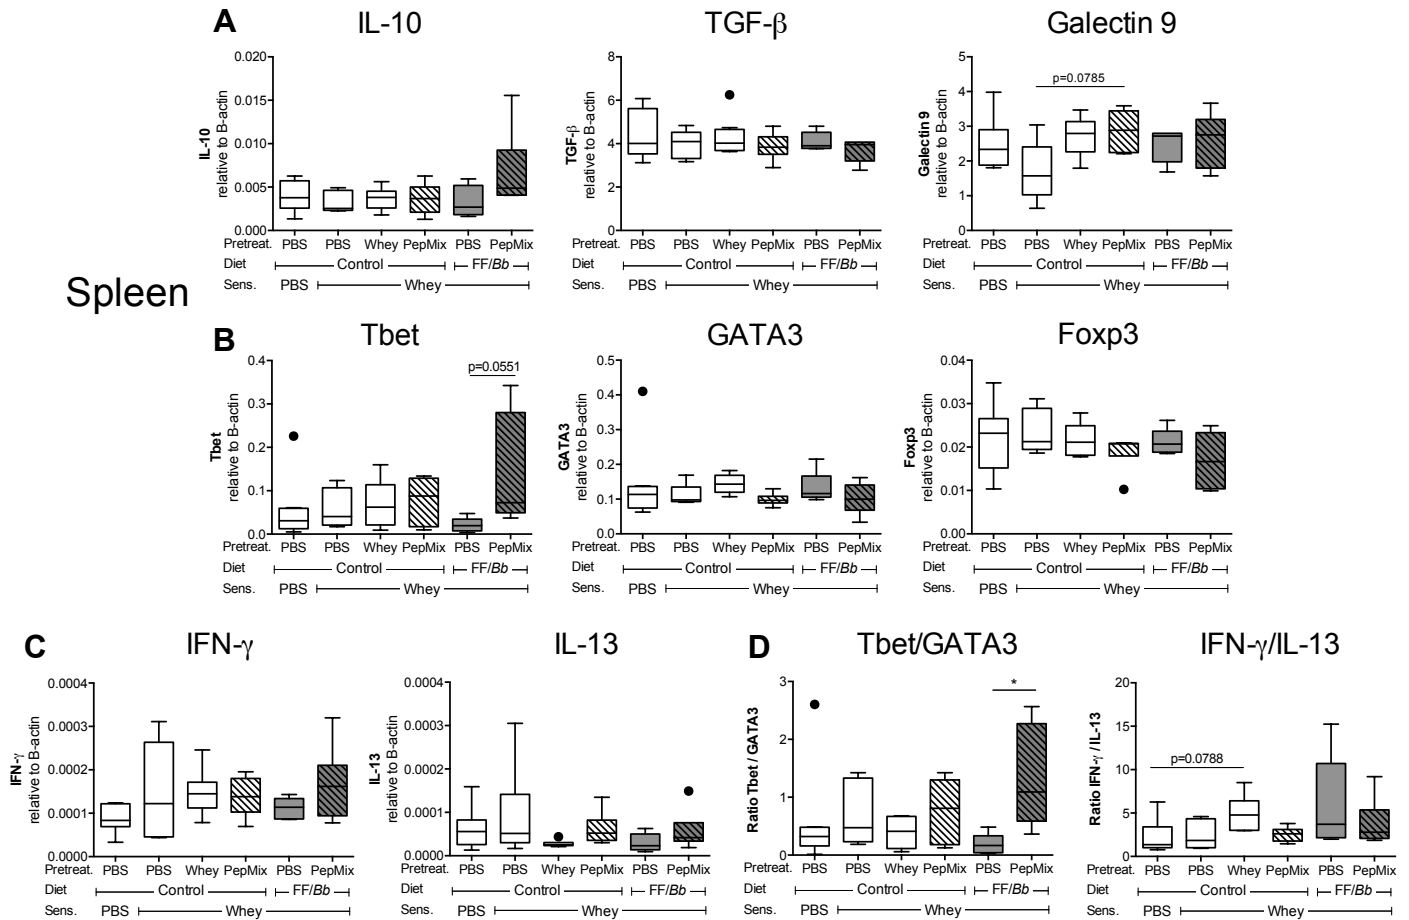

**Figure S1 mRNA expression in the spleen after the challenge phase.** Spleens were collected 18 h after the oral challenge and used for mRNA isolation and cDNA synthesis. mRNA expressions of the regulatory IL-10, TGF- $\beta$  and galectin-9 markers (**A**), Tbet, GATA3, and Foxp3 transcription factors (**B**) and  $T_H1$ -associated IFN- $\gamma$  and  $T_H2$ -associated IL-13 (**C**) were measured using a real-time qPCR. The ratios of Tbet/GATA3 and IFN- $\gamma$ /IL-13 (**D**) were calculated to represent the  $T_H1/T_H2$  balance. mRNA expression is normalized to the B-actin housekeeping gene expression. Data are presented as box-and-whisker Tukey plots, n=4-8/group for IL-10 and n=5-8/group for all others; \* p<0.05 one-way ANOVA followed by Bonferroni's *post hoc* test for selected groups.

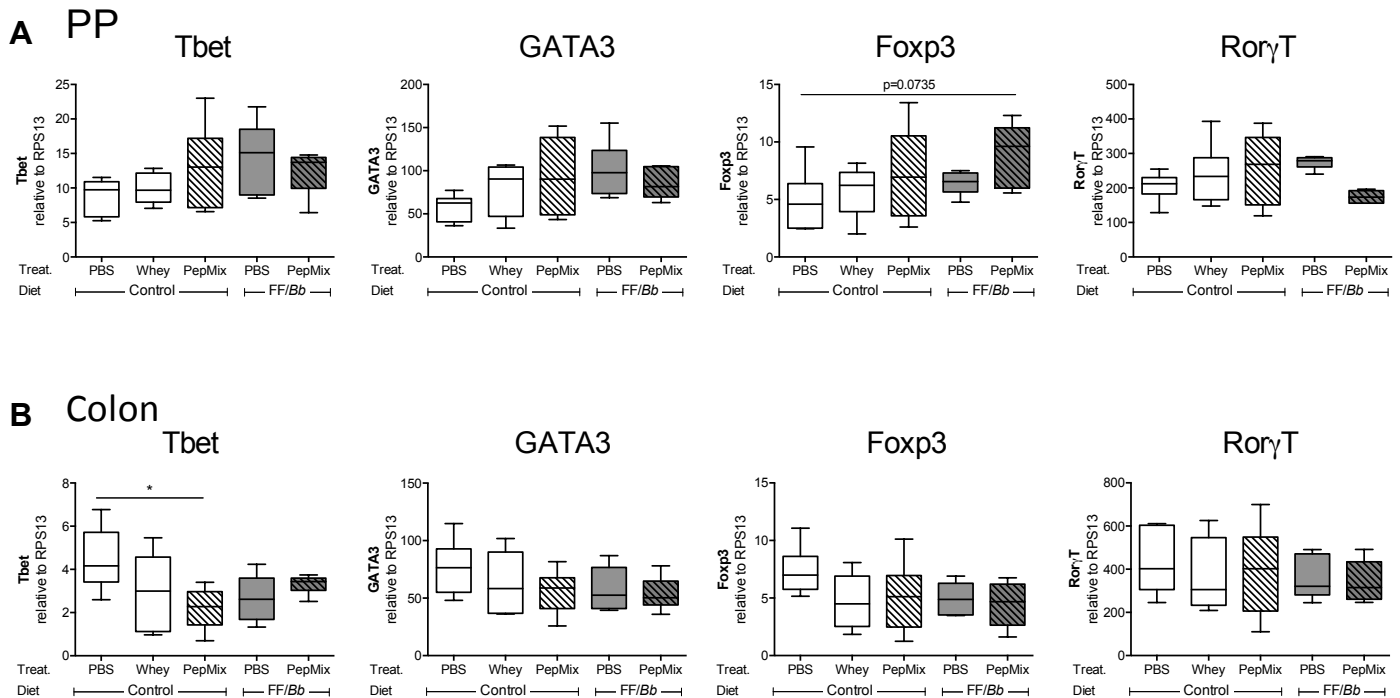

**Figure S2 Impact of the dietary interventions on the transcription factors in the PP and colon during the OT phase.** PP (A) and colon (B) were collected 4 h after the last administration of the OT phase in order to study the mRNA expression of Tbet, GATA3, Foxp3 and Ror $\gamma$ T transcription factors. mRNA expression is normalized to the RPS13 housekeeping gene. Data are presented as box-and-whisker Tukey plots,  $n=5-6$ /group and analyzed with one-way ANOVA followed by Bonferroni's *post hoc* test for selected groups.

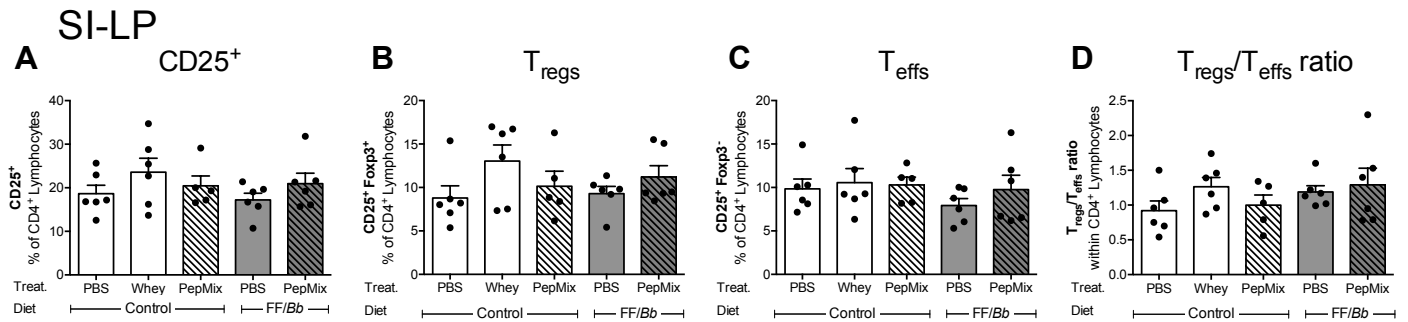

**Figure S3 Flow cytometric analysis of T cells in the small intestine during OT phase.** SI-LP were collected 4 h after the last oral administration of the OT phase. Percentages of CD25<sup>+</sup> T cells (A), CD25<sup>+</sup>Foxp3<sup>+</sup> T<sub>regs</sub> (B) and CD25<sup>+</sup>Foxp3<sup>-</sup> T<sub>effs</sub> (C) were determined within the CD4<sup>+</sup> lymphocyte pool and the balance between T<sub>regs</sub> and T<sub>effs</sub> (D) was investigated. Data are presented as mean ± SEM n=5-6/group.
